# Supplementary material for: Selective and sensitive electrochemical sensors based on an ion imprinting polymer and graphene oxide for the detection of ultra-trace Cd(ii) in biological samples
Source: Royal Society of Chemistry journal article supplement (doi:10.1039/d1ra05489a), 2021-01-01
Supplement: d1ra05489a1.pdf [file d1ra05489a1.pdf]

# Selective and sensitive electrochemical sensor based on ion imprinting polymer and graphene oxide for detection of ultra-trace Cd(II) in biological samples

A. B. Abdallah<sup>\*a</sup>, Mohamed R. El-kholany<sup>a</sup>, A. F. S. Molouk<sup>a</sup>, Tamer Awad Ali<sup>b</sup>,  
A. A. El-Shafei<sup>a</sup>, Magdi E. Khalifa<sup>a</sup>

<sup>a</sup>Department of Chemistry, Faculty of Science, Mansoura University, El-Gomhoria Street, Mansoura-35516, Egypt

<sup>b</sup>Egyptian Petroleum Research Institute, 12622, Egypt

\*E-mail: [ahmed.bahgat@mans.edu.com](mailto:ahmed.bahgat@mans.edu.com) (Tel: 00201090433273)

## Supplementary Material

### Figure Caption

**Figure. S1.** FT-IR spectrum of compound 1.

**Figure. S2.** <sup>1</sup>H-NMR spectrum of compound 1.

**Figure. S3.** EIMS spectrum of compound 1.

**Figure. S4.** FT-IR spectrum of compound 2.

**Figure. S5.** <sup>1</sup>H-NMR spectrum of compound 2.

**Figure. S6.** The possible chelation pathways of the EAAP ligand.

**Figure. S7.** FT-IR spectra of NIP, leached and un-leached IIP for Cd(II).

**Figure. S8.** Comparison of the potentiometric responses of IIP/PVC@GCE and NIP/PVC@GCE for Cd(II) solution at pH 4.5.

**Figure. S9.** The effect of pH on the peak currents of Cd(II) template ( $5 \times 10^{-5}$  mol L<sup>-1</sup>) at scan rate 100 mVsec<sup>-1</sup>

**Figure. S10.** Effect of pH on the potential responses of cadmium buffered templates ( $5 \times 10^{-5}$  mol L<sup>-1</sup>).

**Figure. S11.** The dynamic response of the potentiometric sensor for step changes in different concentration of Cd(II) solution.

**Figure. S12.** Effect of the elution time on IIP/GO@GCE for Cd(II).

**Figure. S13.** Effect of the scan rate on the current of modified GCE for Cd(II) template.

**Figure. S14.** Effect of scan rate on the potential of on the prepared IIP/GO@GCE for Cd(II) template.

**Figure. S15.** The potentiometric responses of IIP/PVC@GCE and NIP/PVC@GCE toward Cd(II), Ni(II), Co(II), Pb(II), Cu(II), Mg(II), Hg(II), Ca(II), and Zn(II).

**Figure. S16.** Effect of the deposition potential on the intensity of current for a solution containing 0.1 mol L<sup>-1</sup> acetate buffer (pH 4.5) and 4.0 μM Cd(II). Deposition time: 60 sec; scan rate: 100 mV.sec<sup>-1</sup>; pulse amplitude: 50 mV; pulse width: 50 msec.

**Figure. S17.** Effect of the deposition time on current density for a solution containing 0.1 mol L<sup>-1</sup> acetate buffer (pH 4.5) and 4.0 μM Cd(II). Deposition potential: -1.5 V; scan rate: 100 mV.sec<sup>-1</sup>; pulse amplitude: 50 mV; pulse width: 50 msec.

**Figure. S18.** ASV of GCE, GO@GCE, NIP/GO@GCE, un-leached IIP/GO@GCE and leached IIP/GO@GCE in a solution containing 0.1 mol L<sup>-1</sup> acetate buffer (pH 4.5) and 4.0 μM Cd(II). Deposition potential: -1.5 V; scan rate: 100 mV.sec<sup>-1</sup>; pulse amplitude: 50 mV; pulse width: 50 msec.

### **Table Caption**

**Table. S1.** Comparison of different voltammetric techniques for cadmium determination by using various modified electrodes.

**Table. S2.** Potentiometric responses of IIP/PVC@GCE and NIP/PVC@GCE toward Cd(II), Ni(II), Co(II), Pb(II), Cu(II), Mg(II), Hg(II), Ca(II), and Zn(II).

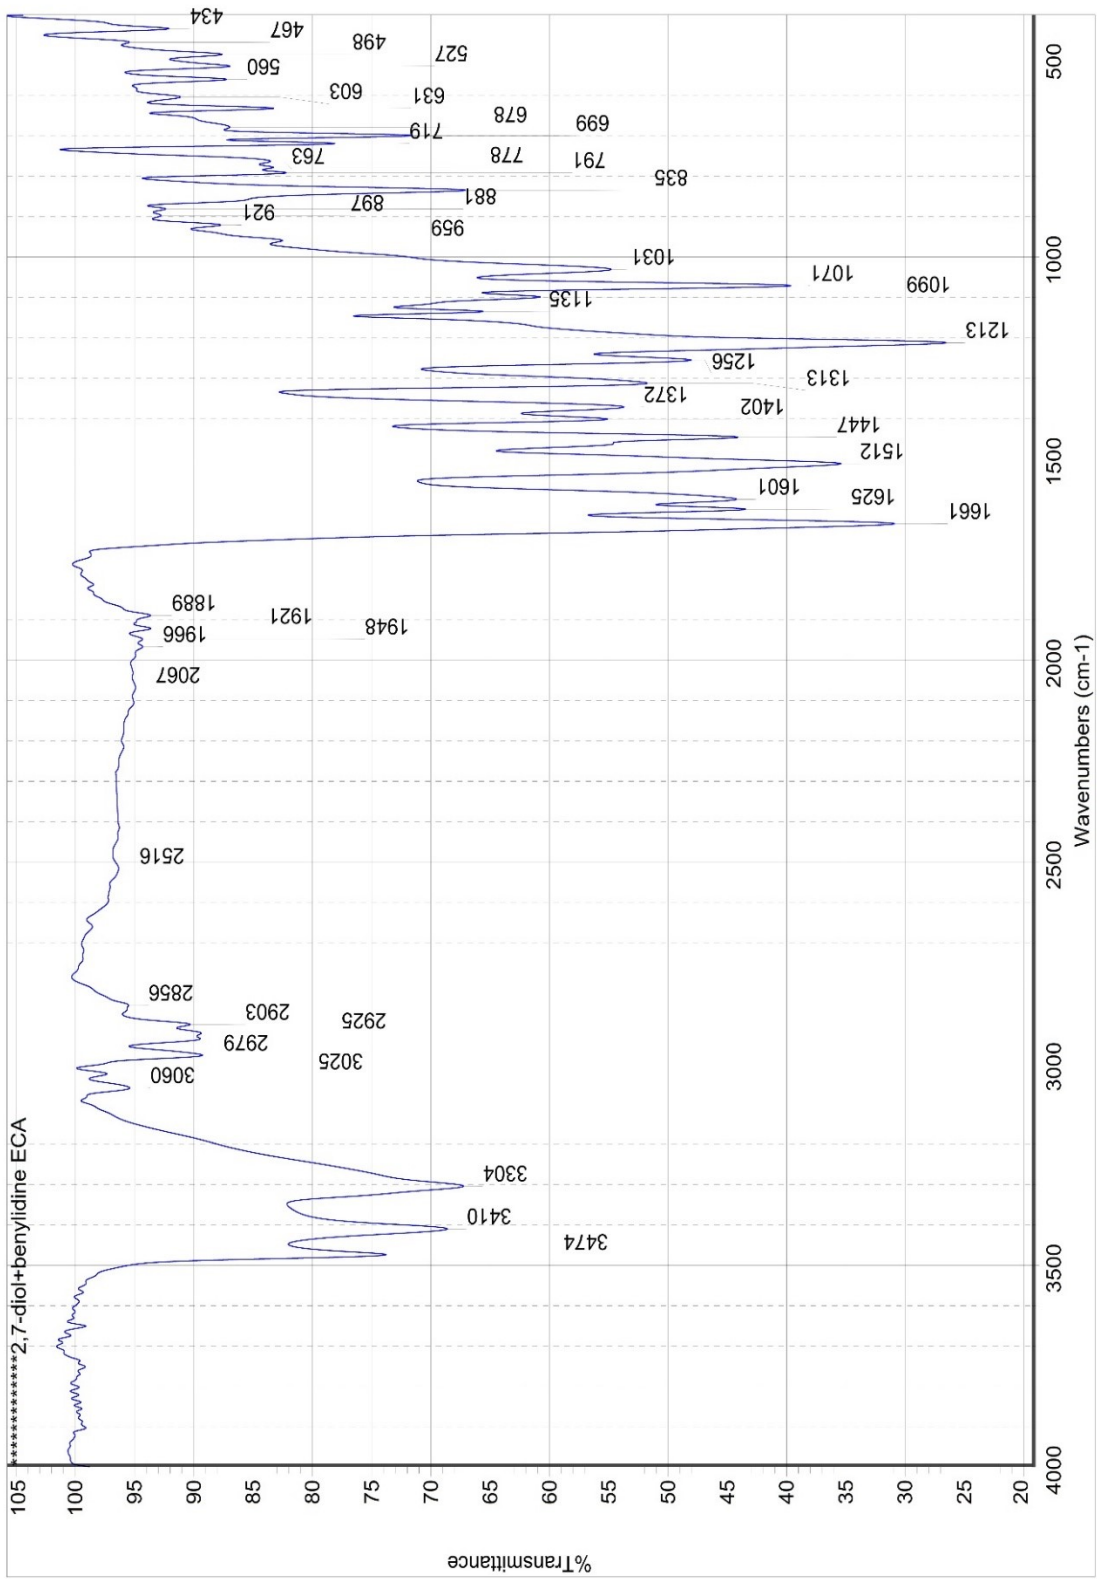

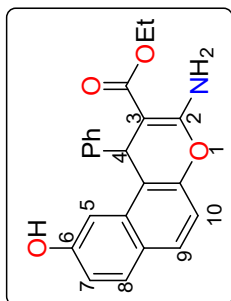

**Figure. S1.**

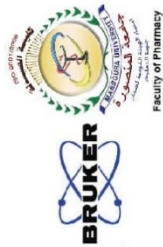

Current Data Parameters  
 NAME Mohammed Reda-EAE-F  
 EXPNO 10  
 PROCNO 1

F2 - Acquisition Parameters  
 Date\_ 20210302  
 Time 14.31 h  
 INSTRUM spect  
 PROBED Z108618\_0945 (zq30)  
 PULPROG 65536  
 SOLVENT DMSO  
 NS 16  
 DS 2  
 SWH 8012.820 Hz  
 FIDRES 0.244532 Hz  
 AQ 4.0894465 sec  
 RG 176.72  
 DW 62.400 usec  
 DE 6.50 usec  
 TE 0 K  
 D1 1.00000000 sec  
 TD0 1  
 SFO1 400.2024712 MHz  
 NUC1 1H  
 P1 13.50 usec  
 PLW1 13.00000000 W

F2 - Processing parameters  
 SI 65536  
 SF 400.2000000 MHz  
 WDW EM  
 SSB 0  
 LB 0.30 Hz  
 GB 0  
 PC 1.00

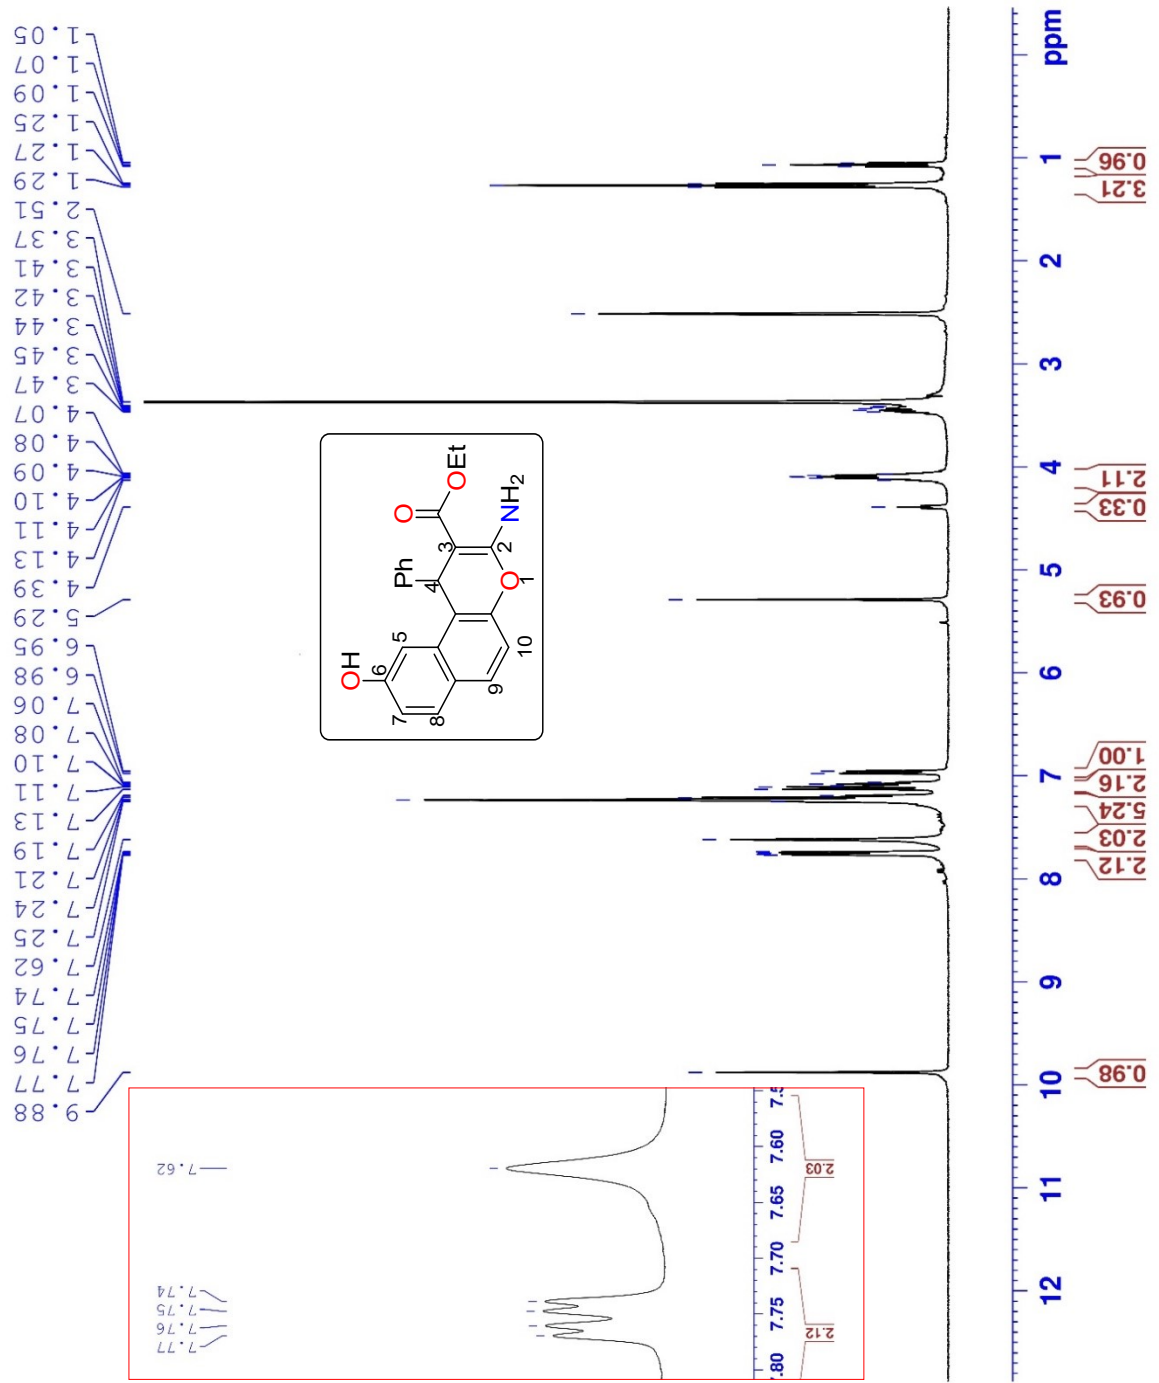

Faculty of Science-Chemistry Department  
Central Laboratory

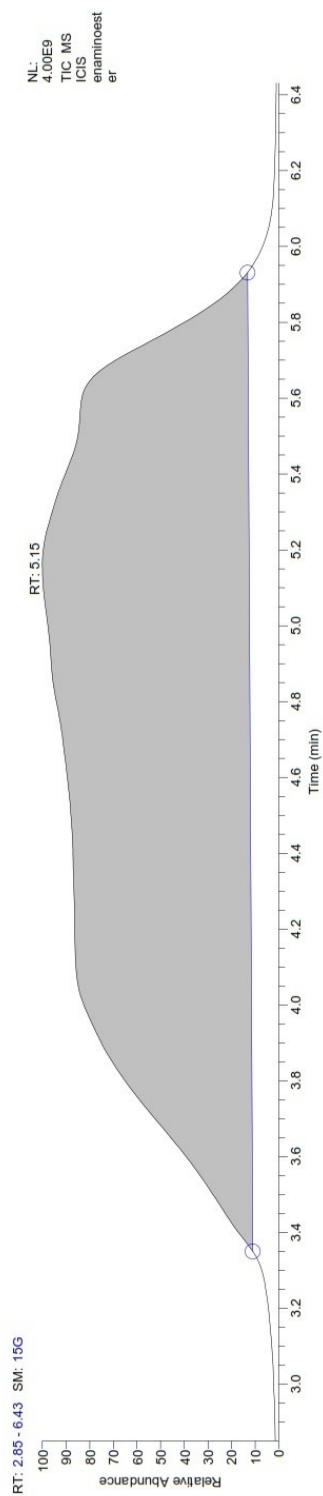

enamoester #373 RT: 5.15 AV: 1 TH: 0.05 NL: 1.21E9  
T: + c Full ms [50.00-450.00]

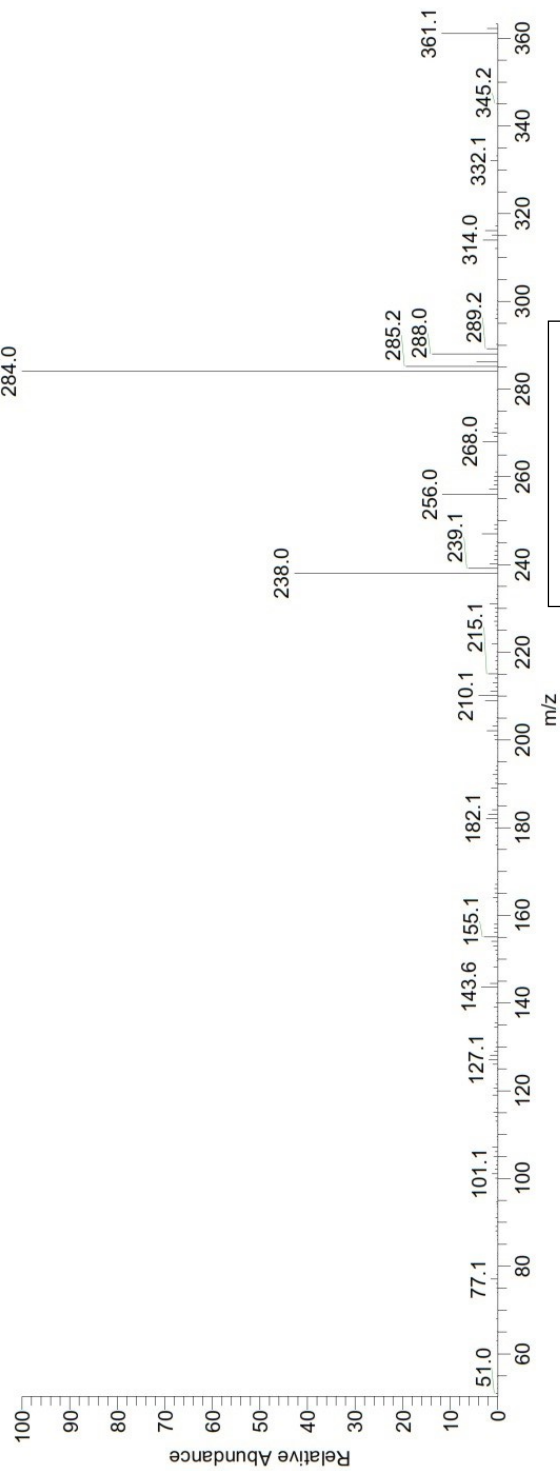

Figure. S1.

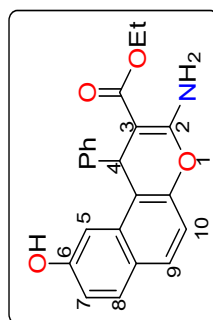

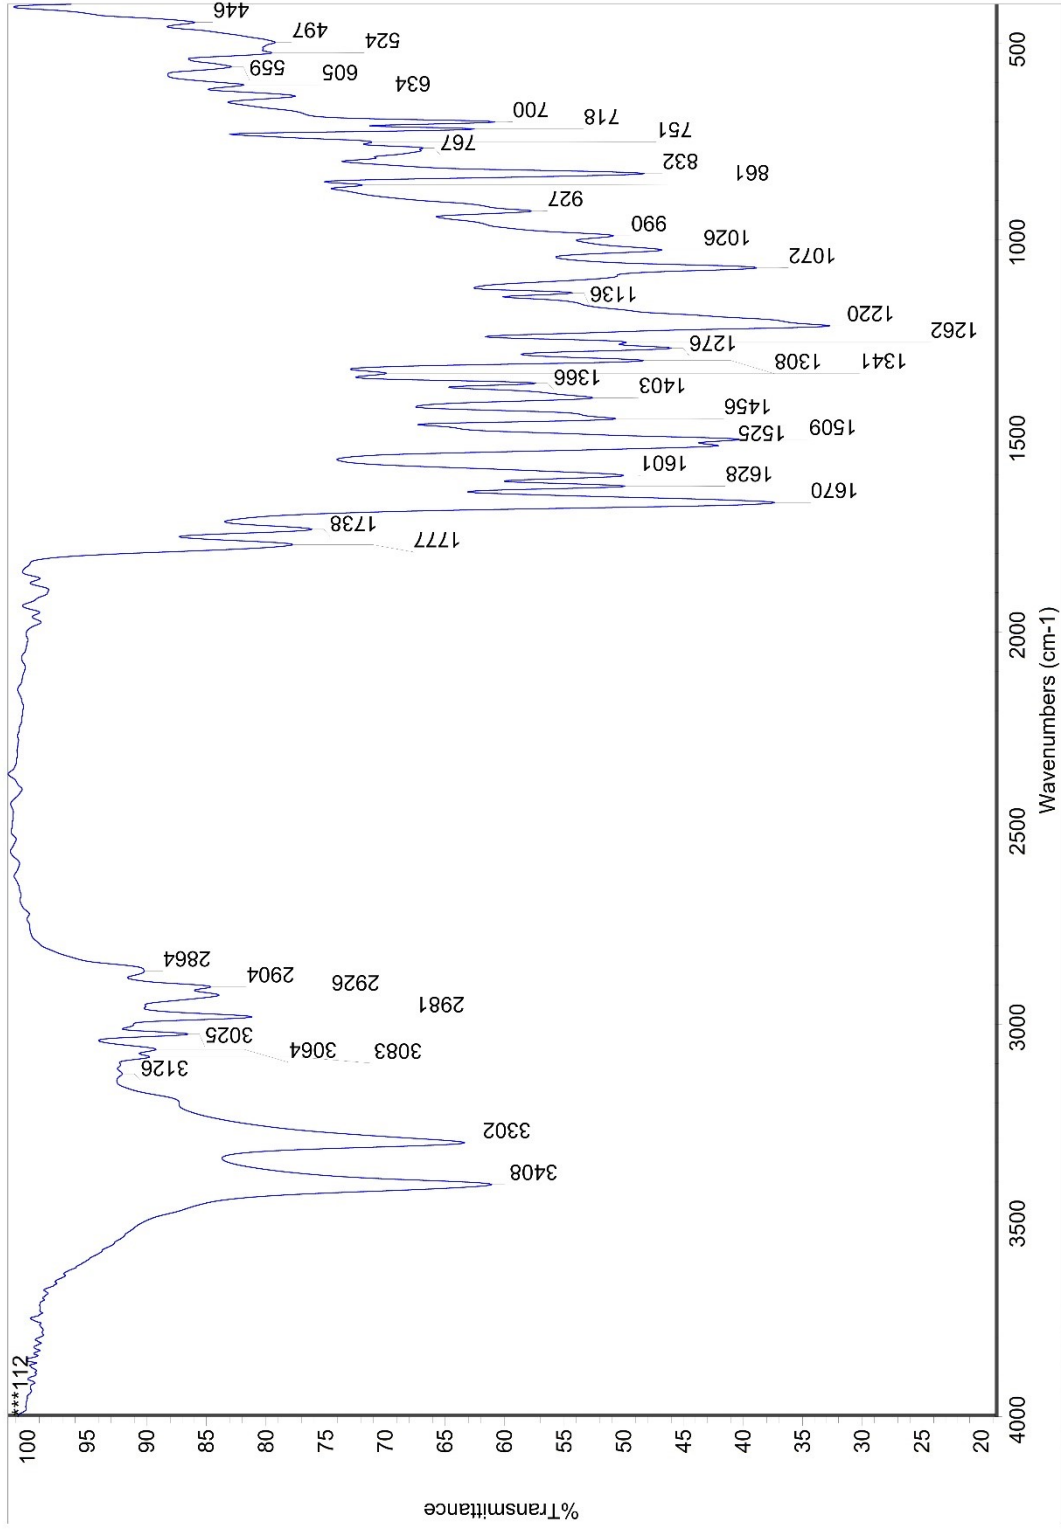

Spectral Analysis Unit  
 Chemistry Department  
 Faculty of Science  
 Mansoura University

Wed Sep 30 13:03:46 2015 (GMT+02:00)  
 \*\*\*112  
 Operator: Sherif Abd El Fattah



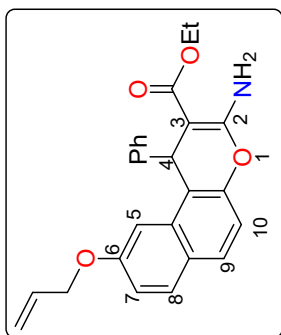

**Figure. S4.**

Mohammed Reda-112-proton-DMSO-D

7.83  
7.82  
7.81  
7.65  
7.28  
7.27  
7.23  
7.22  
7.21  
7.19  
7.12  
7.11  
7.09  
7.07  
7.05  
6.11  
6.10  
6.09  
6.07  
6.06  
6.05  
5.46  
5.42  
5.38  
5.31  
5.29  
4.75  
4.74  
4.72  
4.71  
4.58  
4.56  
4.54  
4.53  
4.15  
4.14  
4.13  
4.12  
4.11  
4.08  
4.06  
4.06  
4.05  
4.04  
3.37  
2.52

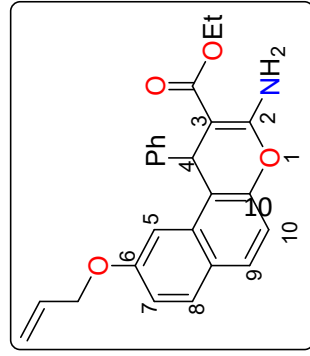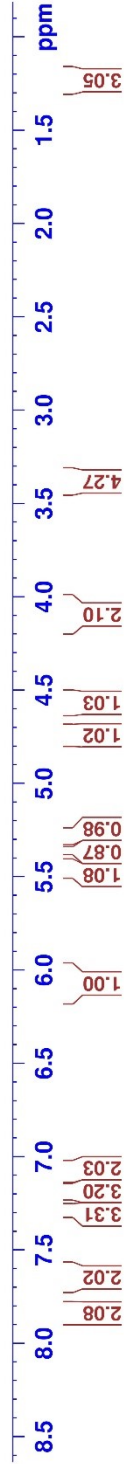

Figure. S5.

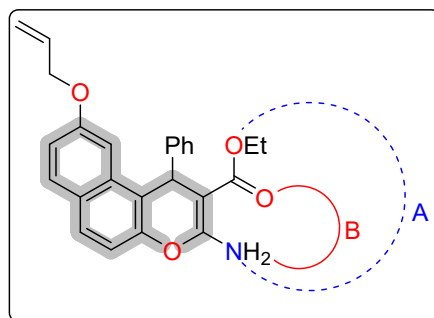

**Figure. S6.**

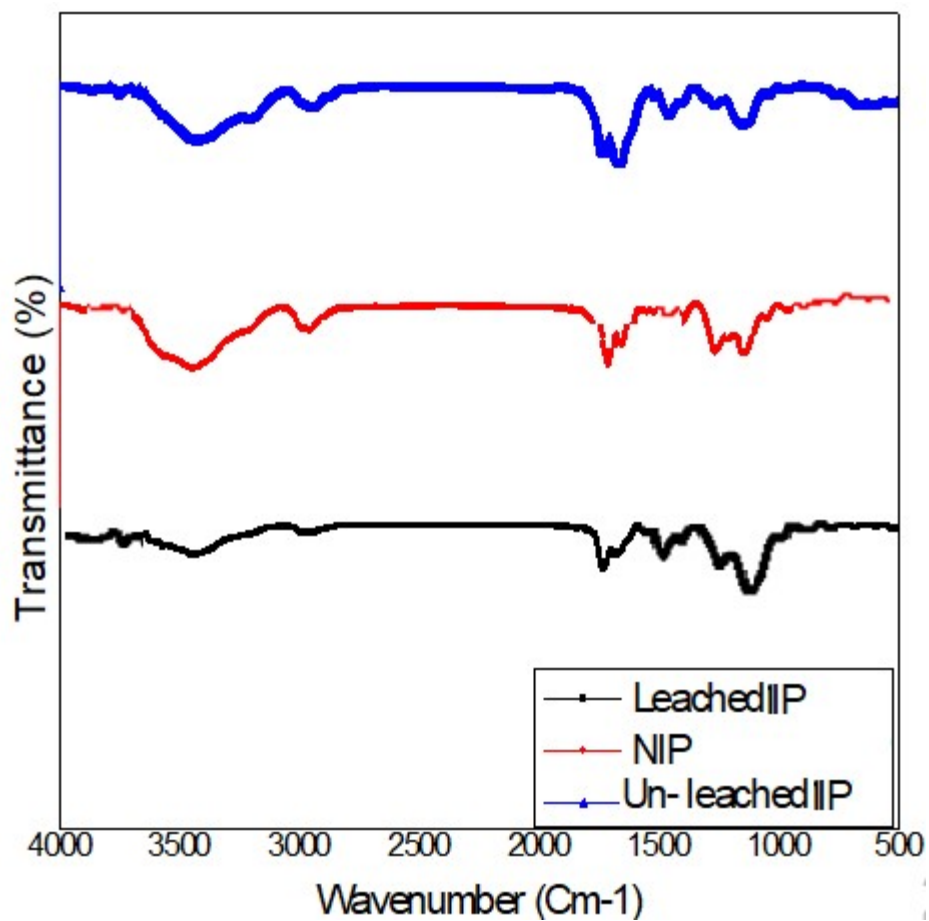

**Figure. S7.**

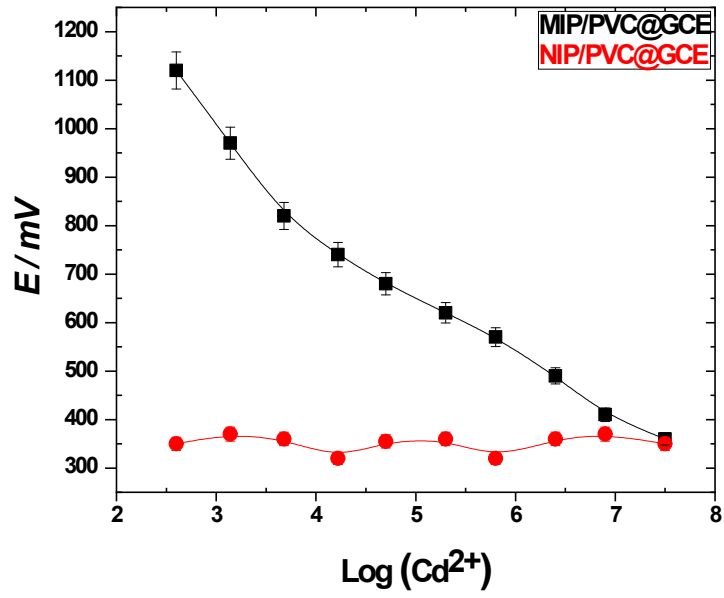

Figure. S8.

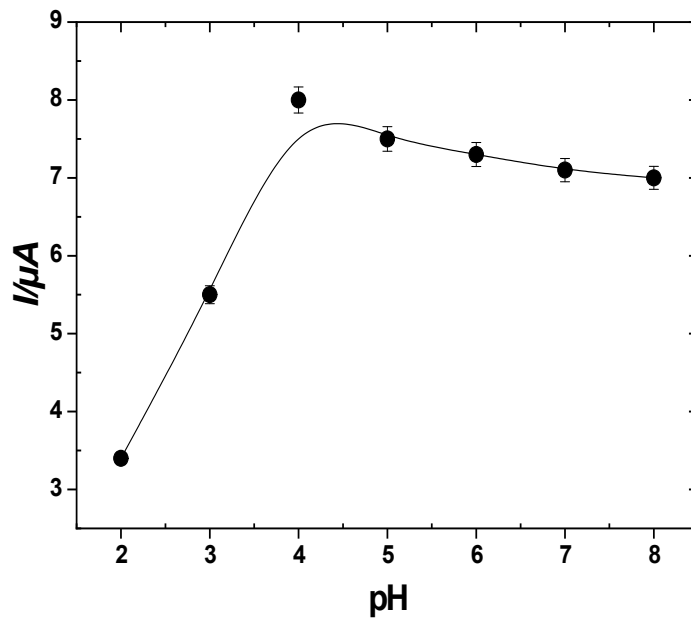

Figure. S9.

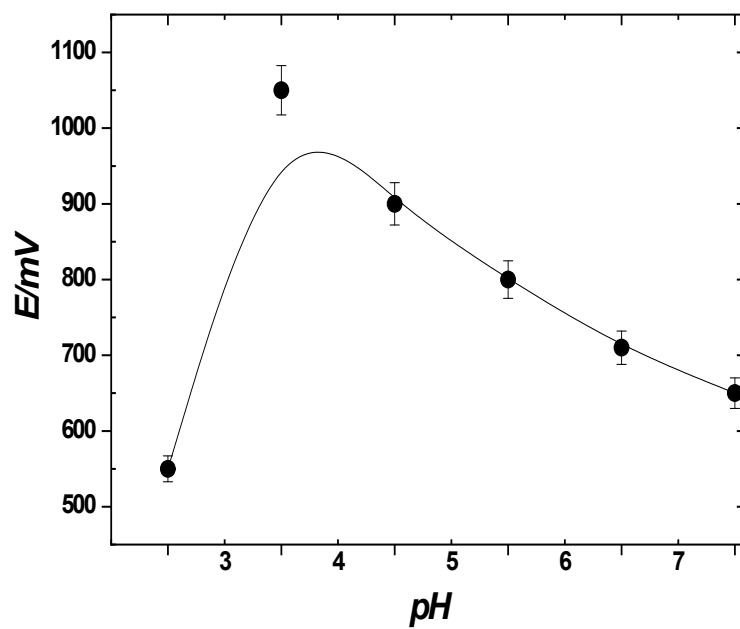

Figure. S10.

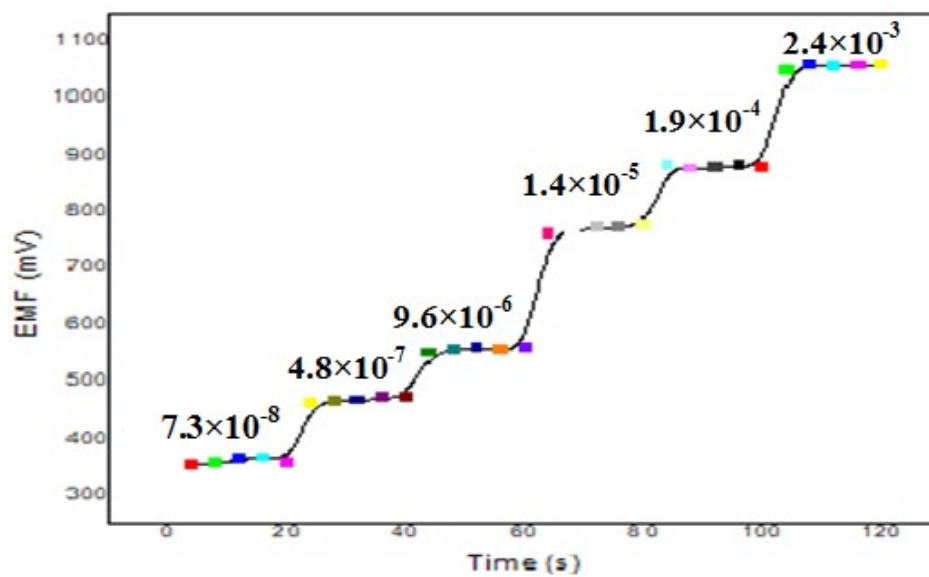

Figure. S11.

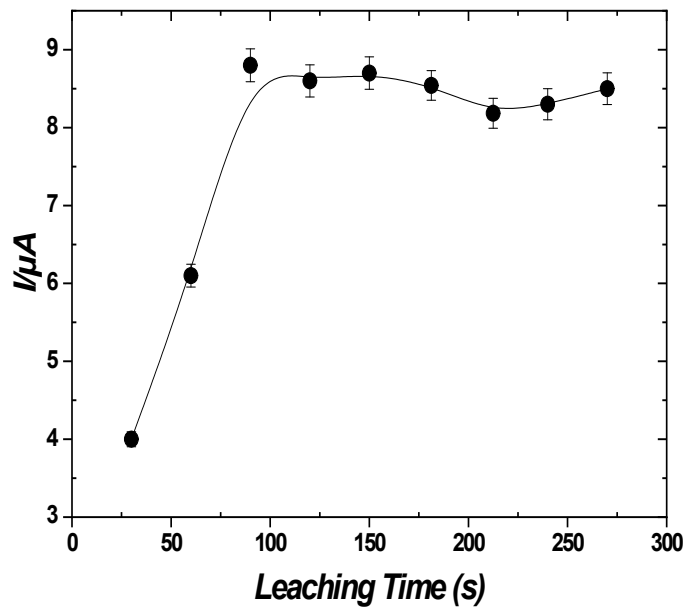

Figure. S12.

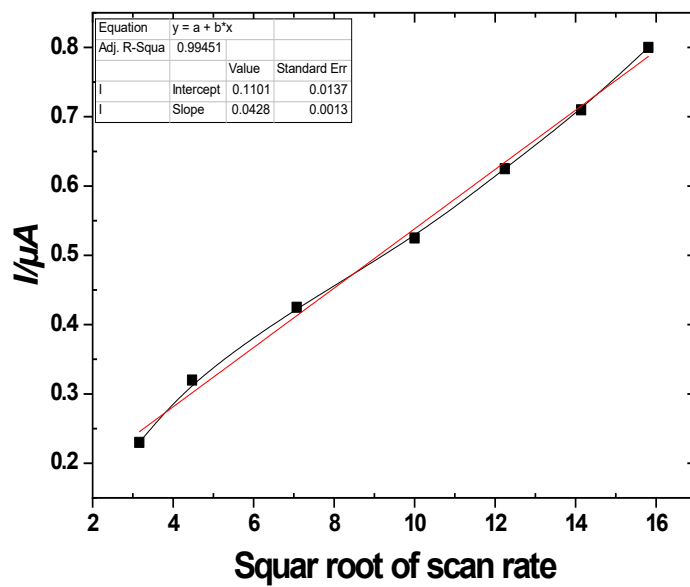

Figure. S13.

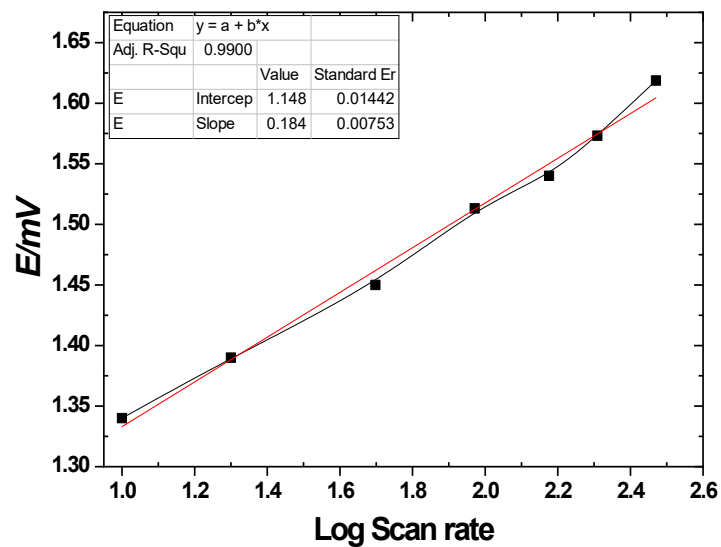

Figure. S14.

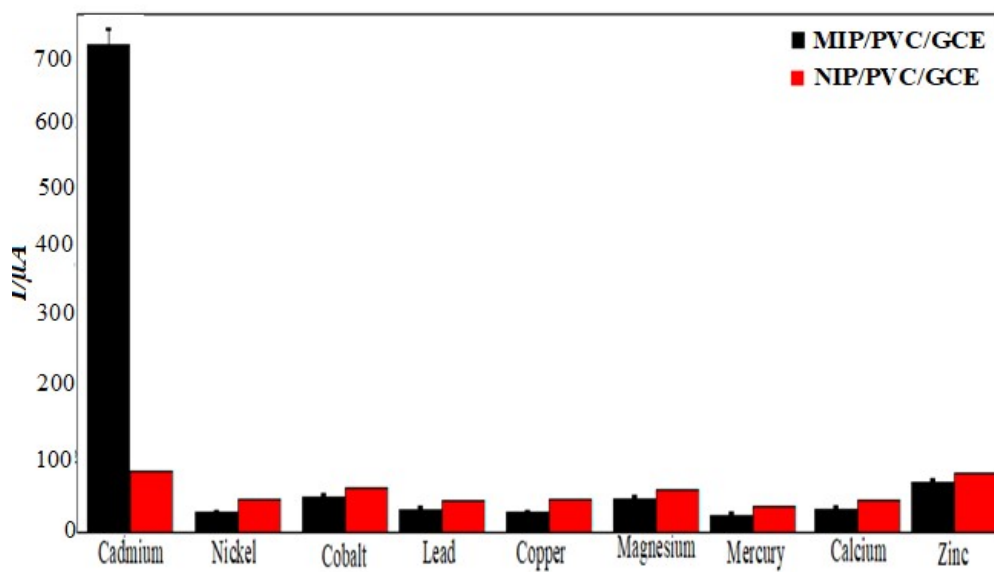

Figure. S15.



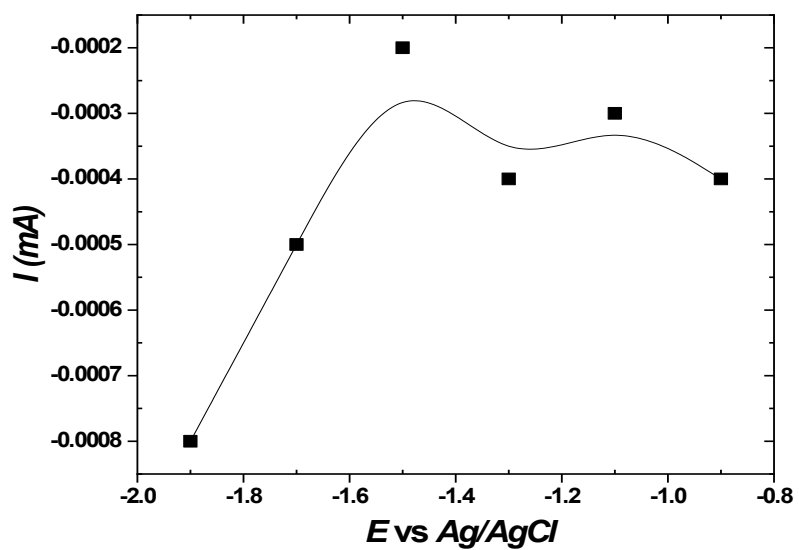

Figure. S16.

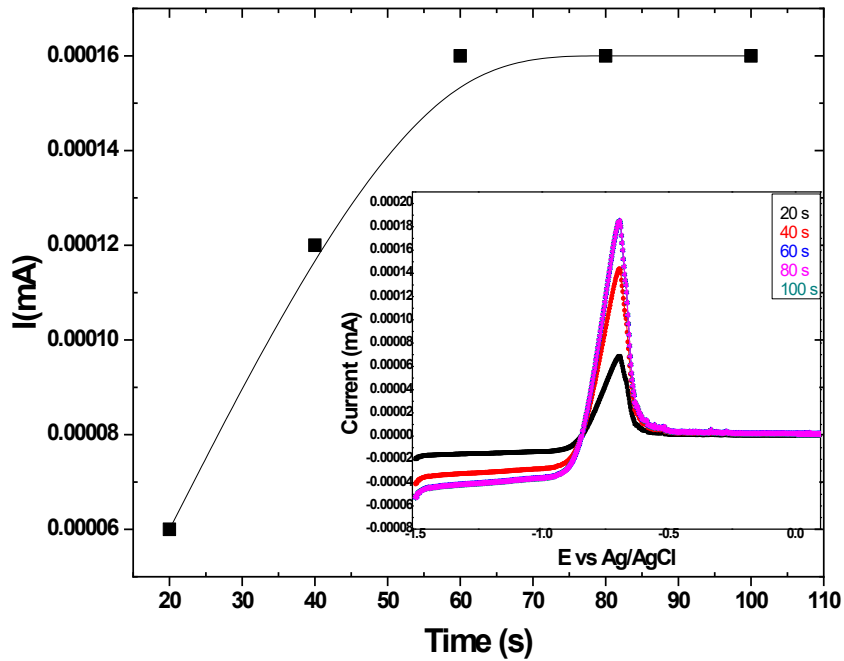

Figure. S17.

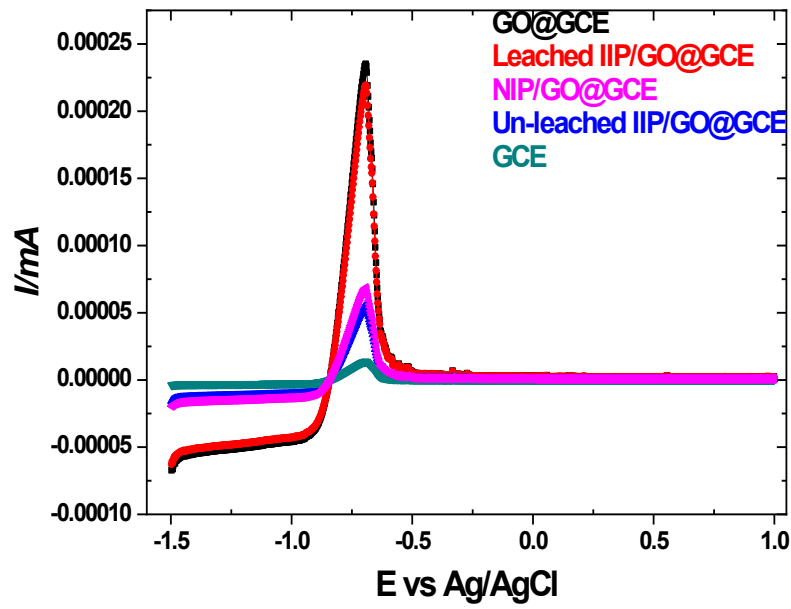

Figure. S18.

**Table. S1.**

| Electrode | Modification                                          | MD                   | Analysis method | DT (min) | DP (V) | Linear range                                                                                                             | LOD                                                                                                               | RT    | Stability                 | Interference                                                                                                         | RSD % | Ref |
|-----------|-------------------------------------------------------|----------------------|-----------------|----------|--------|--------------------------------------------------------------------------------------------------------------------------|-------------------------------------------------------------------------------------------------------------------|-------|---------------------------|----------------------------------------------------------------------------------------------------------------------|-------|-----|
| GCE       | Fe <sub>3</sub> O <sub>4</sub> @SiO <sub>2</sub> @IIP | Cd                   | DPSV            | 5        | -1.2   | 0.008 - 0.8 μM                                                                                                           | 1×10 <sup>-4</sup> μM                                                                                             | 5 min | -                         | Zn(II), Cr(III), Pb(II), Ni(II), Ag(I), Hg(II), K(I)                                                                 | 2.7   | 22  |
| CPE       | Cd-IIP                                                | Cd                   | DPASV           | 5        | -1.1   | 0.5 - 40 μg L <sup>-1</sup>                                                                                              | 0.15 μg L <sup>-1</sup>                                                                                           | -     | 4 weeks                   | (>100 fold of Cd(II))<br>Cu(II) (>100 fold)<br>Pb(II) (>30 fold)<br>(Co(II), Zn(II), Hg(II), Ag(I))<br>(>50 fold)    | 2.82  | 23  |
| CPE       | Cd-IIP                                                | Cd                   | DPASV           | 6        | -1.2   | 2.0 - 200 ng mL <sup>-1</sup>                                                                                            | 0.31 ng mL <sup>-1</sup>                                                                                          | -     | -                         | Cu(II), Zn(II), Pb(II)                                                                                               | 3.4   | 24  |
| CPE       | Chromium oxide                                        | Cd<br>Pb<br>Cu<br>Zn | SWASV           | 1.6      | -1.3   | 10 - 800 μg·L <sup>-1</sup><br>10 - 800 μg·L <sup>-1</sup><br>10 - 800 μg·L <sup>-1</sup><br>80 - 800 μg·L <sup>-1</sup> | 3 μg·L <sup>-1</sup> (Cd)<br>3 μg·L <sup>-1</sup> (Pd)<br>3 μg·L <sup>-1</sup> (Cu)<br>25 μg·L <sup>-1</sup> (Zn) | -     | -                         | Fe(III), Mg(II), K(I), Ca(II), Na(I), NO <sub>3</sub> <sup>-</sup> , SO <sub>4</sub> <sup>2-</sup> , Cl <sup>-</sup> | < 9.5 | 25  |
| GCE       | SnS-Bi <sub>2</sub> O <sub>3</sub>                    | Cd                   | SWASV           | 4        | -0.8   | 0.01 - 0.1 μg·mL <sup>-1</sup>                                                                                           | 1.7×10 <sup>-4</sup> μg·mL <sup>-1</sup>                                                                          | -     | -                         | Ba(II), Hg(II), K(I), Pb(II), Mg(II), Mn(II), Na(I)<br>(>60 fold)                                                    | 1.2   | 26  |
| CPE       | IIP                                                   | Cd                   | DPV             | 3.5      | -1.2   | 10.1 - 2750 and 2750 - 6690 μg L <sup>-1</sup>                                                                           | 4.95 μg L <sup>-1</sup>                                                                                           | -     | -                         | Sn(II)                                                                                                               | 3.4   | 27  |
| CPE       | IIP                                                   | Cd                   | DPV             | 0.5      | -1.2   | 1.0×10 <sup>-9</sup> - 5.0×10 <sup>-7</sup> M                                                                            | 5.2×10 <sup>-10</sup> M                                                                                           | -     | -                         | Pb(II), Hg(II)                                                                                                       | 3.3   | 15  |
| GCE       | IIP/RGO                                               | Cd                   | SWASV           | 10       | -1.5   | 1 - 50 μg L <sup>-1</sup>                                                                                                | 0.13 ng mL <sup>-1</sup>                                                                                          | -     | more than 10 measurements | Cu(II), Zn(II), Mn(II), Fe(II), Mg(II), Ni(II), Hg(II)                                                               | < 5   | 16  |
| GCE       | IIP/RGO                                               | Cd                   | SWASV           | 2        | -1.2   | 1 - 100 μg L <sup>-1</sup>                                                                                               | 0.26 μg L <sup>-1</sup>                                                                                           | -     | 12 h                      | Cr(III), Cr(VI), Mg(II), Zn(II), Mn(II)                                                                              | < 4.6 | 18  |
| CPE       | Bi-Sb film                                            | Cd                   | SWASV           | 3.5      | -1.3   | 1.0 - 220.0 μg L <sup>-1</sup>                                                                                           | 0.15 μg L <sup>-1</sup>                                                                                           | -     | -                         | Cu(II) (1 fold)<br>Ni(II) (4 fold)<br>Pb(II) (80 fold)<br>Co(II) (20 fold)                                           | < 4.4 | 28  |

RGO (reduced graphene oxide), DPASV (differential pulse anodic stripping voltammetry), SWASV (Square wave anodic stripping voltammetry), MD (metal detection), DT (deposition time), DP (deposition potential), LOD (limit of detection), RT (response time), RSD (relative standard deviation).

**Table. S2.**

---

| The interfering ions                                                     | Cd(II) | Ni(II) | Co(II) | Pb(II) | Cu(II) | Mg(II) | Hg(II) | Ca(II) | Zn(II) |
|--------------------------------------------------------------------------|--------|--------|--------|--------|--------|--------|--------|--------|--------|
| Ratio between the potentiometric responses of IIP/PVC@GCE to NIP/PVC@GCE | 8.6    | 1.1    | 1.05   | 0.87   | 1.09   | 1.1    | 0.86   | 1.4    | 1.03   |

---
